# Supplementary material
Source: bioRxiv or medRxiv preprint supplement (https://medrxiv.org/highwire/filestream/80136/field_highwire_adjunct_files/1/2020.05.06.20089573-2.pdf)

**Supplementary Figure 2.** These column charts show the cycle threshold (Ct) value of qRT-PCR test in (A) nasopharyngeal swab and (B) anal swab of case and control groups during first and second admissions. A Ct value less than 37 was interpreted as positive for SARS-CoV-2 RNA.

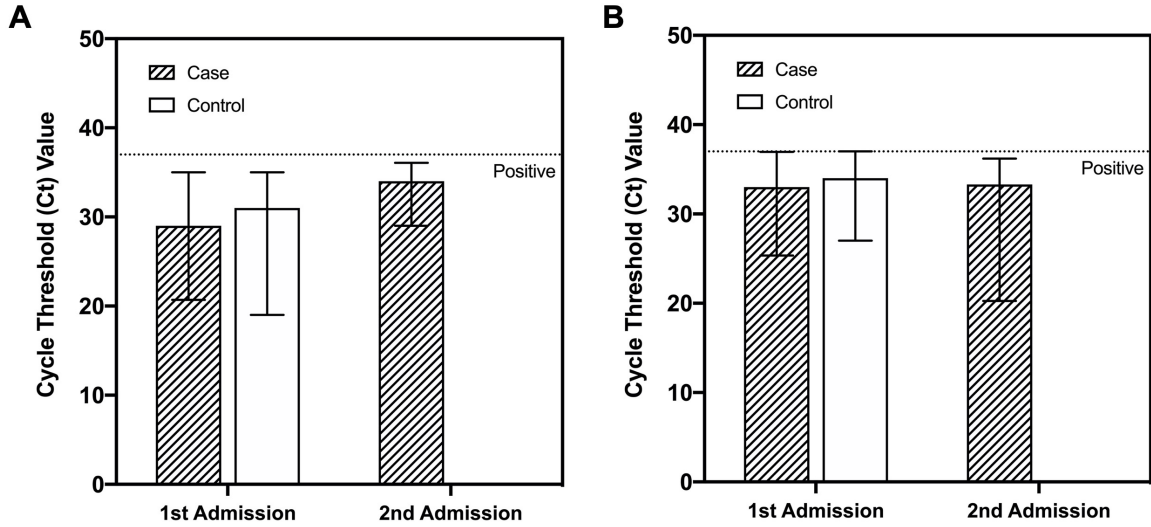

Supplement: Supplementary file [file 2020.05.06.20089573-2.pdf]
